# Supplementary material for: Assessing the Relationship of Ancient and Modern Populations
Source: PubMed Central journal article supplement (PMC5753871; doi:10.1534/genetics.117.300448), 2017-11-22

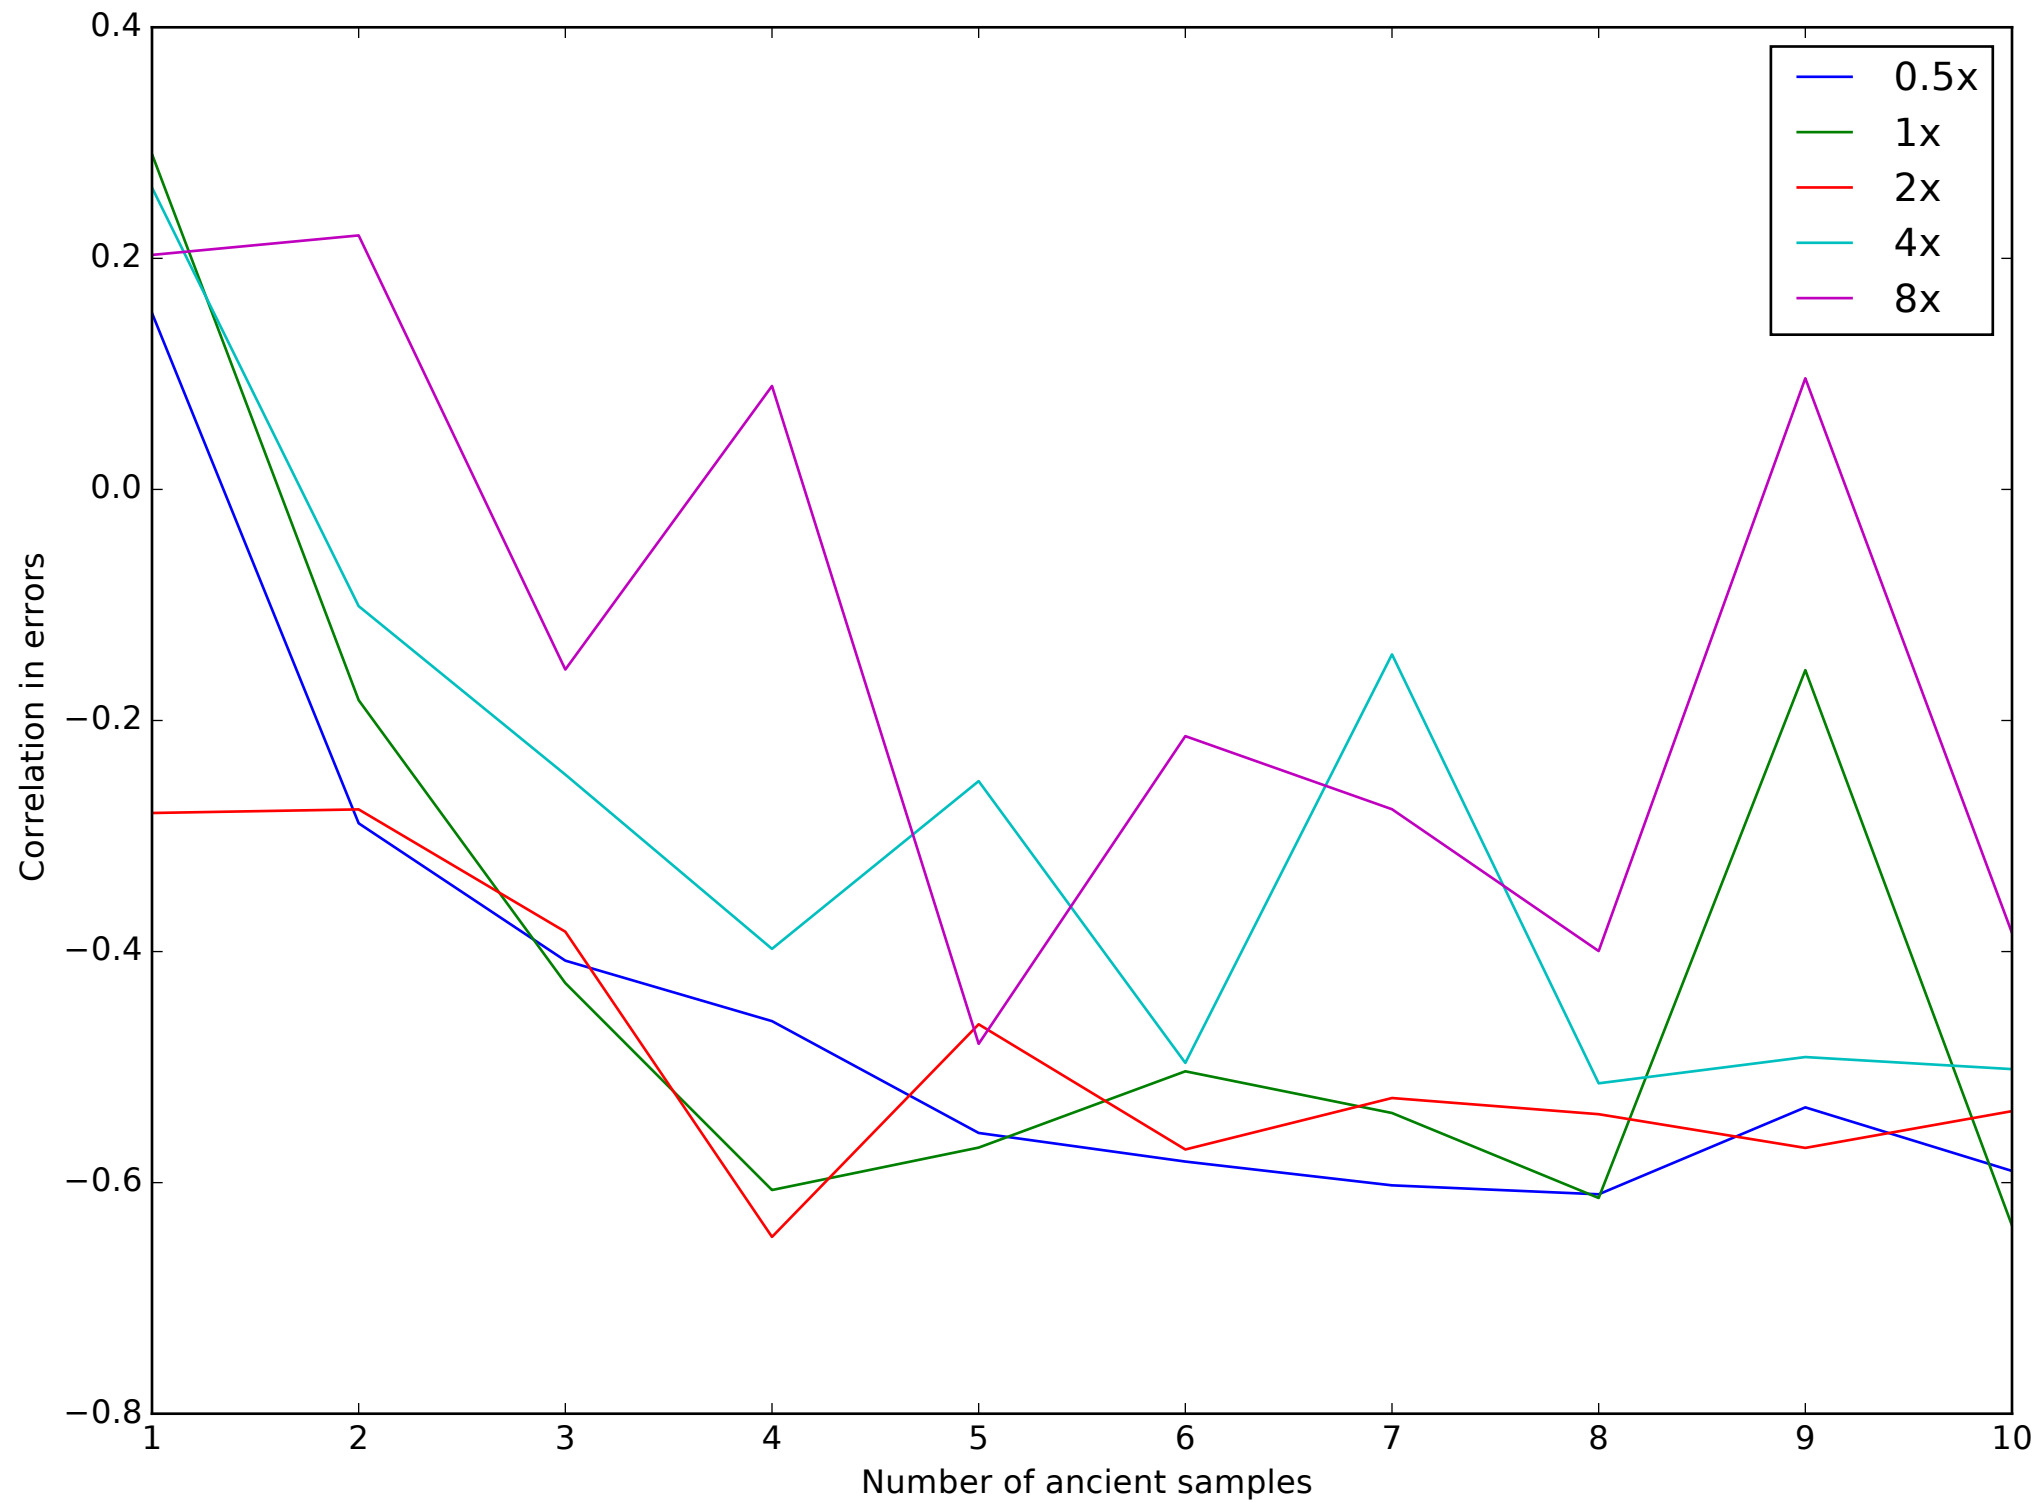

Supplement: 383FigureS1.pdf [file 383FigureS1.pdf]
