# Supplementary material for: Assessing the Relationship of Ancient and Modern Populations
Source: PubMed Central journal article supplement (PMC5753871; doi:10.1534/genetics.117.300448), 2017-11-22
Supplement: 383FileS1.pdf [file 383FileS1.pdf]

Supplementary Figure 1: Correlation of the error in estimating  $t_1$  and  $t_2$ . The x-axis shows the number of ancient individuals sampled, and the y-axis shows the correlation in errors across  $n$  simulations, i.e.  $\frac{1}{n-1} \sum_{i=1}^n (\hat{t}_{1i} - t_1)(\hat{t}_{2i} - t_2)$ . Different lines correspond to different sampling strategies, as indicated in the legend.

Supplementary Table 1: Break down of mean and variance of estimates of  $t_1$  and  $t_2$  under different sampling strategies. “t1mean” and “t2mean” indicate the average value of the MLE across simulations; “t1sd” and “t2sd” indicate the standard deviation of the MLE across simulations.
